# Anti-proliferation of triple-negative breast cancer cells with physagulide P: ROS/JNK signaling pathway induces apoptosis and autophagic cell death

Pei Yu<sup>1,\*</sup>, Chao Zhang<sup>1,\*</sup>, Cai-Yun Gao<sup>1</sup>, Ting Ma<sup>1</sup>, Hao Zhang<sup>1</sup>, Miao-Miao Zhou<sup>1</sup>, Yan-Wei Yang<sup>1</sup>, Lei Yang<sup>1</sup> and Ling-Yi Kong<sup>1</sup>

<sup>1</sup>Jiangsu Key Laboratory of Bioactive Natural Product Research and State Key Laboratory of Natural Medicines, China Pharmaceutical University, Nanjing 210009, China

\*These authors have contributed equally to this work

Correspondence to: Ling-Yi Kong, email: [cpu\\_lykong@126.com](mailto:cpu_lykong@126.com)

Lei Yang, email: [dorothy19802003@gmail.com](mailto:dorothy19802003@gmail.com)

**Keywords:** physagulide P, cell cycle arrest, apoptosis, autophagy, ROS/JNK

**Received:** April 13, 2017

**Accepted:** June 05, 2017

**Published:** July 17, 2017

**Copyright:** Yu et al. This is an open-access article distributed under the terms of the Creative Commons Attribution License 3.0 (CC BY 3.0), which permits unrestricted use, distribution, and reproduction in any medium, provided the original author and source are credited.

## ABSTRACT

**Physagulide P (PP), a new natural compound, was isolated from *Physalis angulate L.* in our laboratory. In this study, we demonstrated that PP potently suppressed cell proliferation by inducing G2/M phase arrest in MDA-MB-231 and MDA-MB-468 cells. Moreover, PP provoked apoptosis by decreasing the mitochondrial membrane potential and elevating the Bax/Bcl-2 protein expression ratio. The caspase inhibitor Z-VAD-FMK partly restore cell viability, suggesting that apoptosis plays as an important role in the anti-proliferative effect of PP. PP-treated cells also underwent autophagy, as evidenced by the formation of autophagosomes and the accumulation of LC3BII. Furthermore, the knockdown of LC3B reduced PP-induced cytotoxicity, indicating that autophagy played an anticancer effect. PP also induced the generation of reactive oxygen species (ROS) and resulted in c-Jun N-terminal kinases (JNK) activation. Accordingly, JNK siRNA significantly attenuated PP-triggered apoptosis and autophagy, and ROS scavengers almost completely reverse this apoptosis and autophagy. The ROS scavenger also blocked PP-induced G2/M phase arrest and the phosphorylation of JNK. Our results revealed that PP induced G2/M phase arrest, apoptosis and autophagy via the ROS/JNK signaling pathway in MDA-MB-231 and MDA-MB-468 cells. Therefore, PP is a promising candidate for the development of antitumor drugs for the treatment of triple-negative breast cancer.**

## INTRODUCTION

Breast cancer is the most common cancer among women worldwide [1]. In the United States, 231,840 new cases of invasive breast cancer and 40,290 deaths from this disease are estimated to occur in 2015, and one in eight women will develop breast cancer during their lifetime [2]. Triple-negative breast cancer, defined by the lack of expression of estrogen receptor $\alpha$  (ER $\alpha$ ) and progesterone receptor (PR) as well as the absence of overexpression and/or gene amplification of HER2, is a unique subtype of breast cancer with limited treatment

options and poor prognosis [3, 4]. Compared with any other subtypes of breast cancer, triple-negative breast cancer follows a more aggressive clinical course and shows a higher risk of recurrence and death in the first 3 to 5 years after diagnosis [5]. In addition, current treatment regimens lead to chemoresistance and toxicity [6]. Hence, the development of novel therapeutic strategies as well as effective and less toxic drugs are essential in fighting triple-negative breast cancer.

Cell proliferation requires the completion of the cell cycle, which is regulated by cyclin-dependent kinases (CDKs) and CDK inhibitor proteins [7]. Specifically,

a successful G2/M transition is important for cells proliferation, and this transition is regulated by cyclin family members, including Cyclin B1, Cdc2, Cdc25C, Chk1/2 and p21 [8–11]. Cell cycle regulation imbalance is a characteristic of cancer cells and promotes the occurrence and development of tumors [12].

Apoptosis, or type-I programmed cell death (PCD), involves the activation of catabolic enzymes – in particular proteases – in signaling cascades, which leads to cell membrane blebbing, cell shrinkage, nuclear fragmentation, chromatin condensation, DNA fragmentation, and the formation of apoptotic bodies [13–15]. Autophagy, which is classified as the type-II PCD, is a catabolic process that sequesters cytoplasmic proteins and organelles into autophagosomes and transports them to lysosomes for recycling and degradation [16, 17]. However, the ability of PP to induce apoptosis or autophagy as well as their roles and interplay in the PP-induced cell growth inhibition of triple-negative breast cancer cells remain to be determined.

ROS are mainly formed in mitochondria and are involved in the regulation of different physiological processes, including apoptosis and autophagy [18, 19]. ROS can affect various signaling pathways such as mitogen-activated protein kinase (MAPK) signal transduction cascades [20, 21]. Moreover, JNK, a stress-activated protein kinase (SAPK) of the MAPK family, plays a pivotal role in many cellular events, including apoptosis and autophagy [22, 23]. In short, targeting the ROS/JNK signaling pathway may be effective for the treatment of triple-negative breast cancer.

*Physalis angulata L.*, a traditional Chinese herbal medicine, is an annual herb distributed in many countries located in tropical and subtropical regions of the world and is used worldwide for its fruits. Extracts or infusions from this plant have been used in various countries in popular medicine as a treatment for a variety of illnesses, such as malaria, asthma, hepatitis, dermatitis, rheumatism, wound healing, sleeping sickness, earache, and fever, among others [24–28]. In the present study, we report the novel anticancer effect of PP (Figure 1A) purified from *Physalis angulata L.* in triple-negative breast cancer. We further explored the molecular mechanisms, that is, the induction of G2/M phase arrest, apoptosis and autophagy mediated by the ROS/JNK signaling pathway.

## RESULTS

### PP inhibited the proliferation of triple-negative breast cancer cells

To investigate the anti-proliferative effect of PP on triple-negative breast cancer cells, MDA-MB-231 and MDA-MB-468 cells were treated with various concentrations of PP. 3-[4, 5-dimethylthiazole-2-yl]-2, 5-diphenyltetrazolium bromide (MTT) results showed that PP inhibited MDA-MB-231 and MDA-MB-468 cell growth in a dose- and time-dependent manner (Figure 1B).

Moreover, a colony formation assay showed that fewer colonies formed after PP treatment, and this effect depended on dose (Figure 1C). MDA-MB-231 and MDA-MB-468 cells were also labeled with carboxyfluorescein diacetate, succinimidyl ester (CFDA-SE) to monitor the effect of PP on cell division. After entering the cell, CFDA-SE is equally distributed between the daughter cells when the cell divides; thus, its fluorescence intensity decreases as the cell divides. As shown in Figure 1D, the CFDA-SE fluorescence intensity increased in a dose-dependent manner after treatment with PP, suggesting that PP inhibited cell division and proliferation. To further confirm the effect of PP on cell proliferation, a 5-ethynyl-20-deoxyuridine (EdU) incorporation assay was employed, Figure 1E shows that PP significantly and dose-dependently reduced the number of EdU-positive cells compared with the control group. These results show that PP inhibits the proliferation of MDA-MB-231 and MDA-MB-468 cells in a dose- and time-dependent manner.

### PP induced G2/M phase arrest in triple-negative breast cancer cells

Cell cycle arrest inhibits cell proliferation. To investigate the role of cell cycle arrest in the PP-mediated inhibition of cell proliferation, we examined the distribution of cell cycle in cells treated with PP by flow cytometry after staining with PI. As shown in Figure 2A, PP led to the accumulation of cells in the G2/M phase in a dose-dependent manner. To elucidate the mechanisms underlying this effect, we measured the expression levels of cell cycle-regulated proteins. A Western blotting analysis showed that PP up-regulated the expressions of p21, and down-regulated the levels of Cyclin B1 phospho-Cdc25C, Cdc25C, phospho-Cdc2 and Cdc2 (Figure 2B). Taken together, these data suggest that the PP may alter the expression of cell-cycle related proteins to induce G2/M phase arrest and consequently inhibit the proliferation of triple-negative breast cancer cells.

### PP triggered mitochondrial apoptosis in triple-negative breast cancer cells

To examine whether the cell growth inhibition induced by PP also depends on apoptosis, PP-treated cells were stained with Annexin V-Alexa Fluor 647/propidium iodide (PI), which showed that PP treatment induced remarkable apoptosis comparing to the control group (Figure 3A). We then measured the mitochondrial membrane potential ( $\Delta\Psi_m$ ) by flow cytometry and found that PP treatment decreased the  $\Delta\Psi_m$  in a dose-dependent manner (Figure 3B). In addition to this change in  $\Delta\Psi_m$ , increased Bax and decreased Bcl-2 protein expression were also observed after treatment with PP (Figure 3C).  $\Delta\Psi_m$  is well known to play an important role in the release of Cytochrome c (Cyt c). Thus, Cyt c expression was

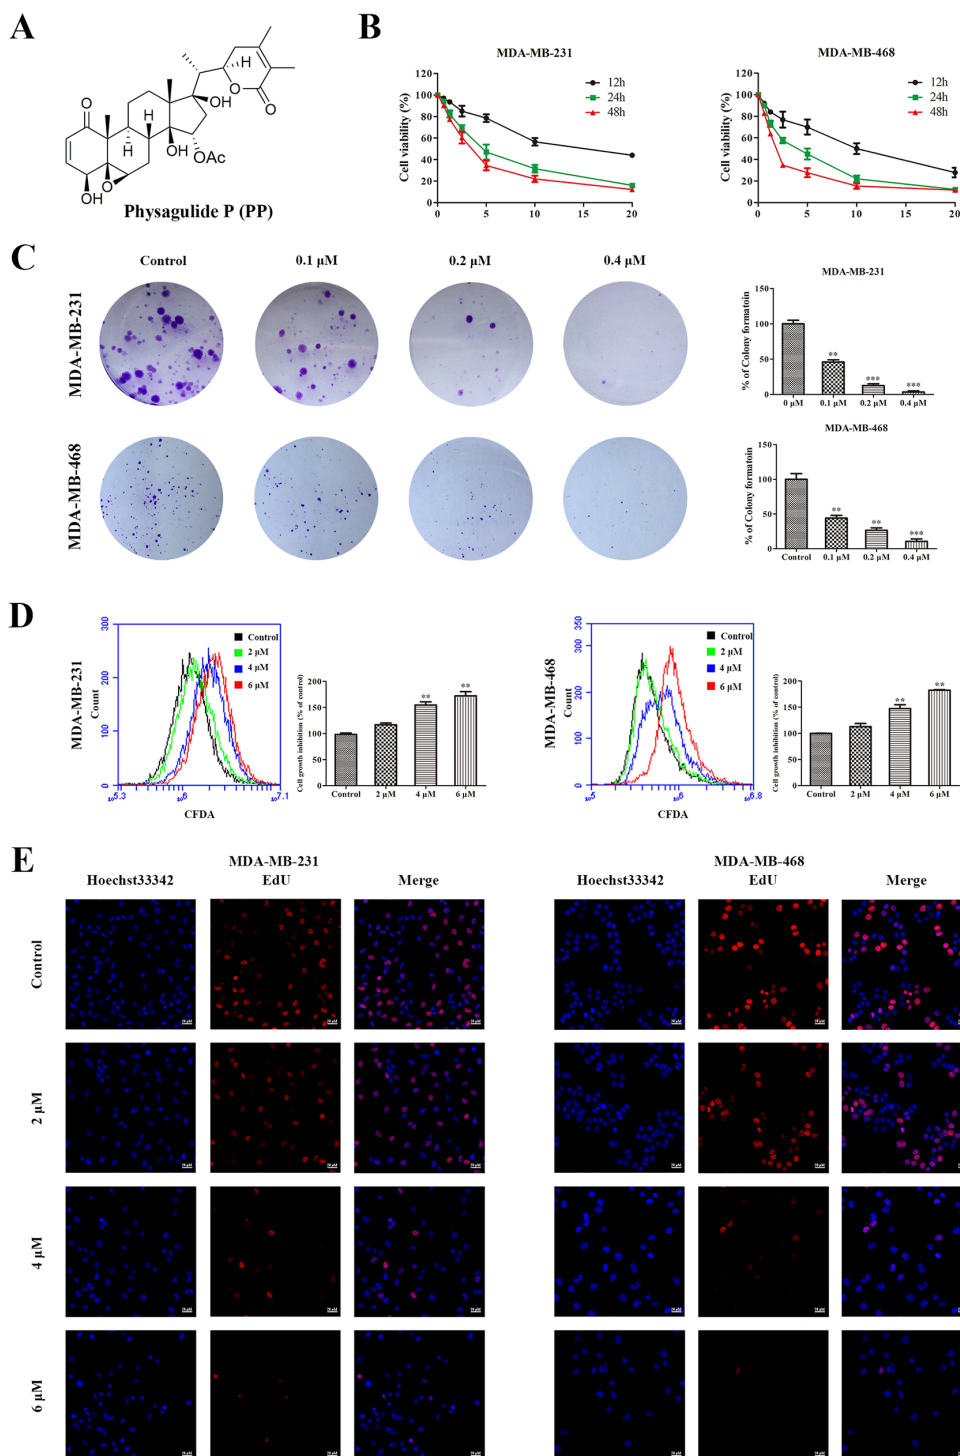

**Figure 1: PP inhibited cell growth in triple-negative breast cancer cells. (A)** The chemical structure of physagulide P. **(B)** MDA-MB-231 and MDA-MB-468 cells were treated with different concentrations of PP for 12-48 h, and the cell viability was measured with an MTT assay. **(C)** MDA-MB-231 and MDA-MB-468 cells were treated with different concentrations of PP for 14 d and colony formation was assessed by staining with crystal violet. **(D)** MDA-MB-231 and MDA-MB-468 cells were treated with different concentrations of PP for 24 h, and cell division was assessed with a CFDA-SE assay. **(E)** MDA-MB-231 and MDA-MB-468 cells were incubated with various concentrations of PP for 24 h, stained with EdU and observed using a confocal microscopy. Scale bars = 20 μm. The results were similar in at least three independent experiments. \* $p < 0.05$ , \*\* $p < 0.01$ , vs. control group.

further investigated by immunofluorescence. As shown in Figure 3D, Cyt c localizes to the inner mitochondrial membrane of untreated cells, but it was released into the cytosol after treatment with PP for 24 h. These results demonstrated that PP triggered apoptosis by inducing mitochondrial membrane depolarization and Cyt c release.

In the absence of functional mitochondria, apoptosomes form and activate the apoptosis process. In our study, we observed significant caspase-9, caspase-7, caspase-3 and PARP processing in total cell lysates from PP-treated cells, and the cleavage of caspase-9, caspase-7, caspase-3 and PARP markedly increased in both a time- and dose-dependent manner in MDA-MB-231 and MDA-MB-468 cells (Figure 4A).

Furthermore, when MDA-MB-231 and MDA-MB-468 cells were pre-treated with the pan-caspase inhibitor Z-VAD-FMK (10  $\mu$ M) for 1 h before treatment with PP, cell viability was partly restored (Figure 4B). Taken together, these data suggest that the cytotoxic effects of PP on MDA-MB-231 and MDA-MB-468 cells were partly caused by the activation of caspase-dependent apoptosis.

### PP induced autophagic cell growth inhibition in triple-negative breast cancer cells

Autophagy, i.e., type-II PCD, plays a key role in the antiproliferative effects of external factors. As shown in

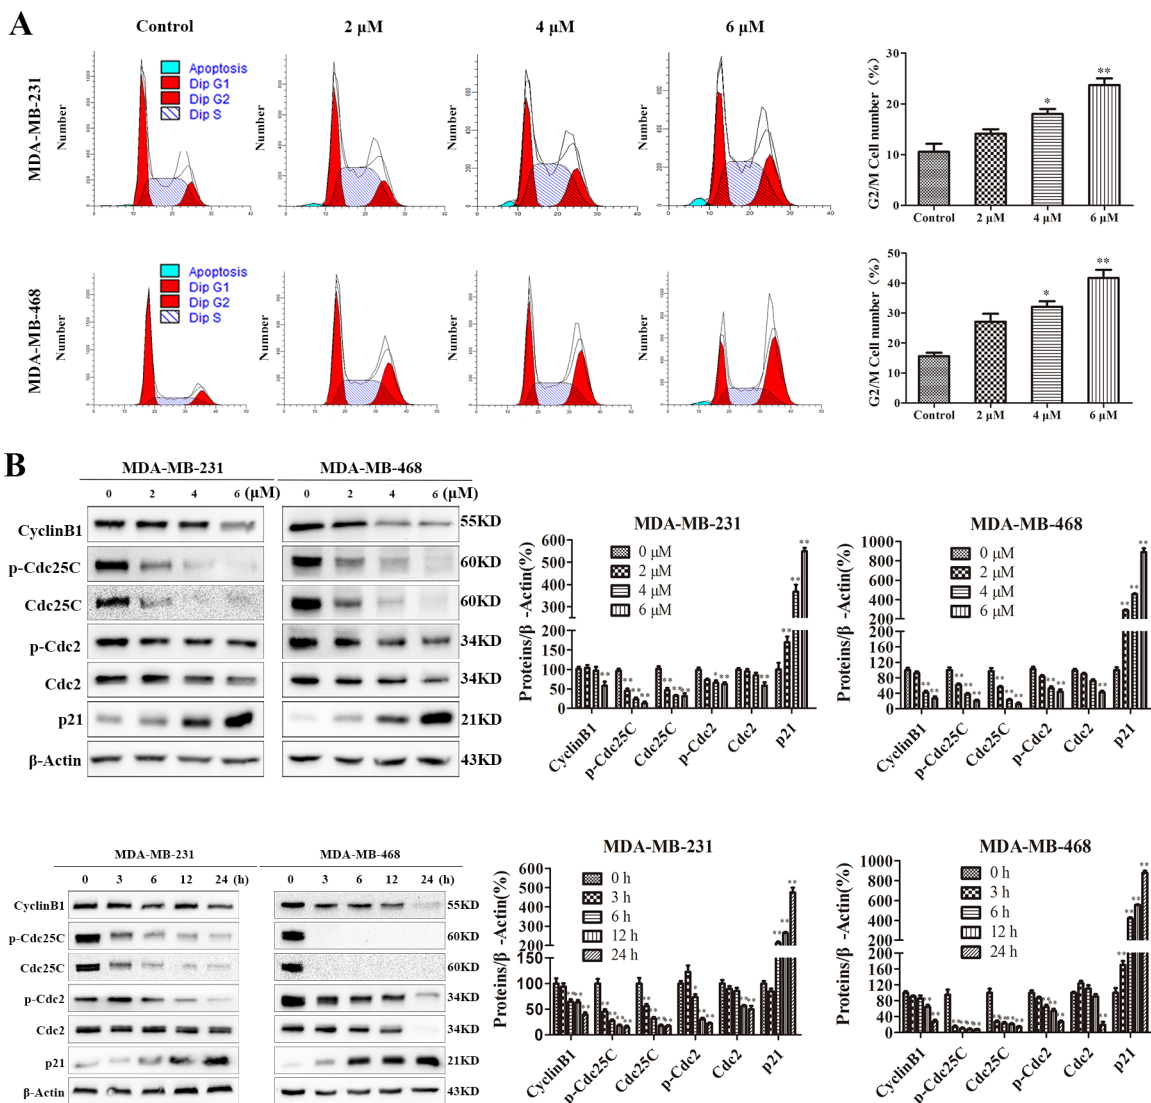

**Figure 2: PP induced G2/M phase arrest in triple-negative breast cancer cells.** (A) MDA-MB-231 and MDA-MB-468 cells were treated with different concentrations of PP for 24 h, and the cell cycle distribution was measured using flow cytometry. (B) MDA-MB-231 and MDA-MB-468 cells were treated with different concentrations of PP for 24 h and 6  $\mu$ M PP for different periods, and the expression levels of cell cycle-regulated proteins were measured by Western blotting. The results were similar in at least three independent experiments. \* $p < 0.05$ , \*\* $p < 0.01$ , vs. control group.



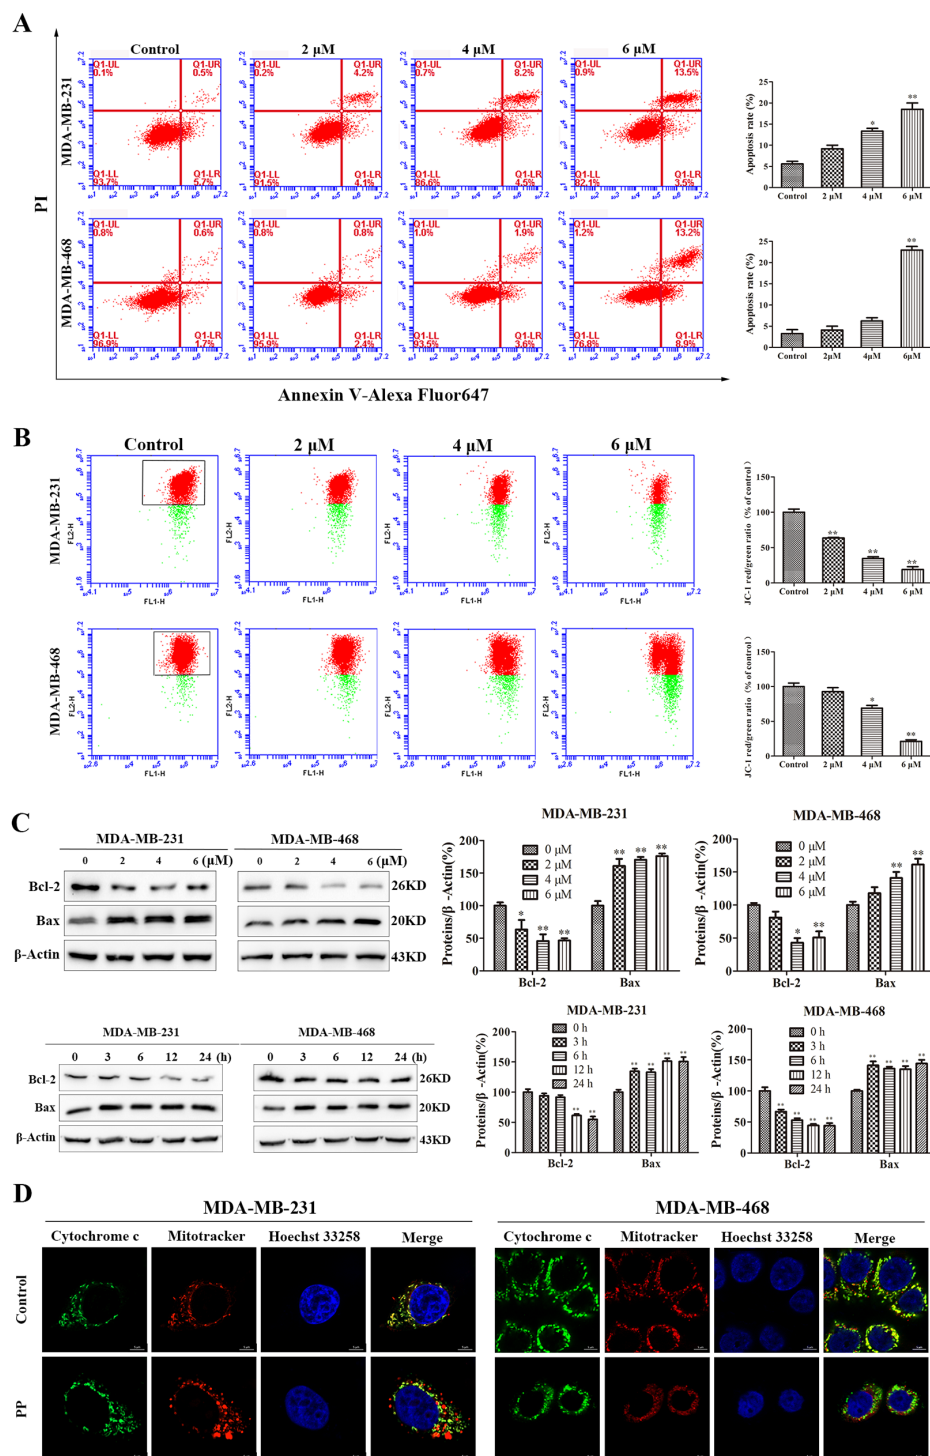

**Figure 3: PP induced mitochondrial dysfunction in triple-negative breast cancer cells.** (A) The rates of apoptotic MDA-MB-231 and MDA-MB-468 cells after treatment with PP for 24 h, as determined by Annexin V-Alexa Fluor 647 and PI staining. (B) The mitochondrial membrane potential of MDA-MB-231 and MDA-MB-468 cells treated with PP for 24 h, as measured by flow cytometry with JC-1 staining. (C) The expressions of Bax and Bcl-2 in MDA-MB-231 and MDA-MB-468 cells after treatment with various concentrations of PP for 24 h and 6 μM PP for different periods. (D) MDA-MB-231 and MDA-MB-468 cells were treated with 6 μM PP for 24 h, and their immunofluorescence was assessed. Green: FITC-labeled Cytochrome c; Red: Mito-Tracker-labeled mitochondria; Blue: Hoechst 33258-labeled nuclei. Scale bars = 5 μm. The results were similar in at least three independent experiments. \* $p < 0.05$ , \*\* $p < 0.01$ , vs. control group.

Figure 5A, the concentration-dependent formation of acidic vesicular organelles (AVOs) was evident in PP-treated cells stained with the lysosomo-tropic agent acridine orange. In addition, LC3BII expression was significantly increased and p62/SQSTM1 expression was significantly attenuated in a concentration- and time-dependent manner in both PP-treated cell lines (Figure 5B). Consistent with the results of the Western blotting analysis, the PP-treated MDA-MB-231 and MDA-MB-468 cells exhibited an increase in the punctate pattern of LC3B and lysosome fluorescence, which represent the recruitment of LC3B into autophagosomes and the formation of autophagy lysosomes (Figure 5C). To further demonstrate the formation of autophagy lysosomes, MDA-MB-231 and MDA-MB-468 cells were transfected

with Ad-mCherry-GFP-LC3B adenovirus. Green fluorescence was almost completely quenched and appeared as red dots in PP-treated cells (Figure 6A), indicating that PP induced the formation of autophagy lysosomes. To determine the role of autophagosome accumulation in PP-induced cytotoxicity, we knocked down LC3B, which showed that the viability of the LC3B siRNA-treated group was higher than that of the NC siRNA group (Figure 6B). However, the apoptosis and the expression of cleaved caspase-9 and cleaved caspase-3 did not significantly differ between the LC3B siRNA group and the NC siRNA group (Figure 6C–6D). These results suggest that autophagy acts as another way participated in triple-negative breast cancer cell growth inhibition of PP.

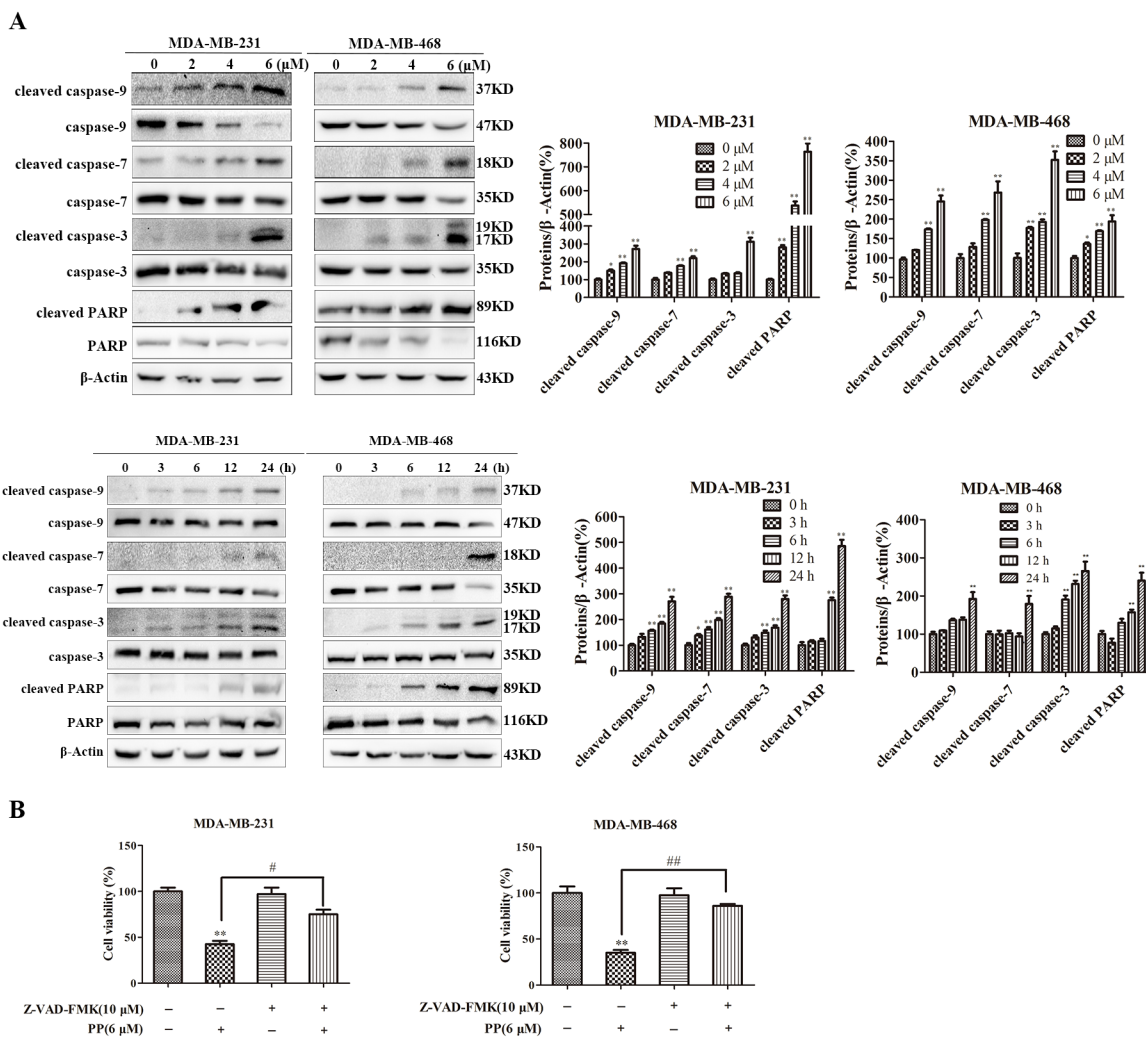

**Figure 4: PP induced apoptosis in triple-negative breast cancer cells.** (A) The expression of cleaved caspase-9, caspase-9, cleaved caspase-7, caspase-7, cleaved caspase-3, caspase-3, cleaved PARP and PARP in MDA-MB-231 and MDA-MB-468 cells after treatment with various concentrations of PP for 24 h and 6 μM PP for different periods. (B) MDA-MB-231 and MDA-MB-468 cells were treated with 6 μM PP alone or in combination with the pan-caspase inhibitor Z-VAD-FMK (10 μM) for 24 h, and then cell viability was assessed with an MTT assay. The results were similar in at least three independent experiments. \**p* < 0.05, \*\**p* < 0.01, vs. control group; #*p* < 0.05, ##*p* < 0.01 vs. PP group.

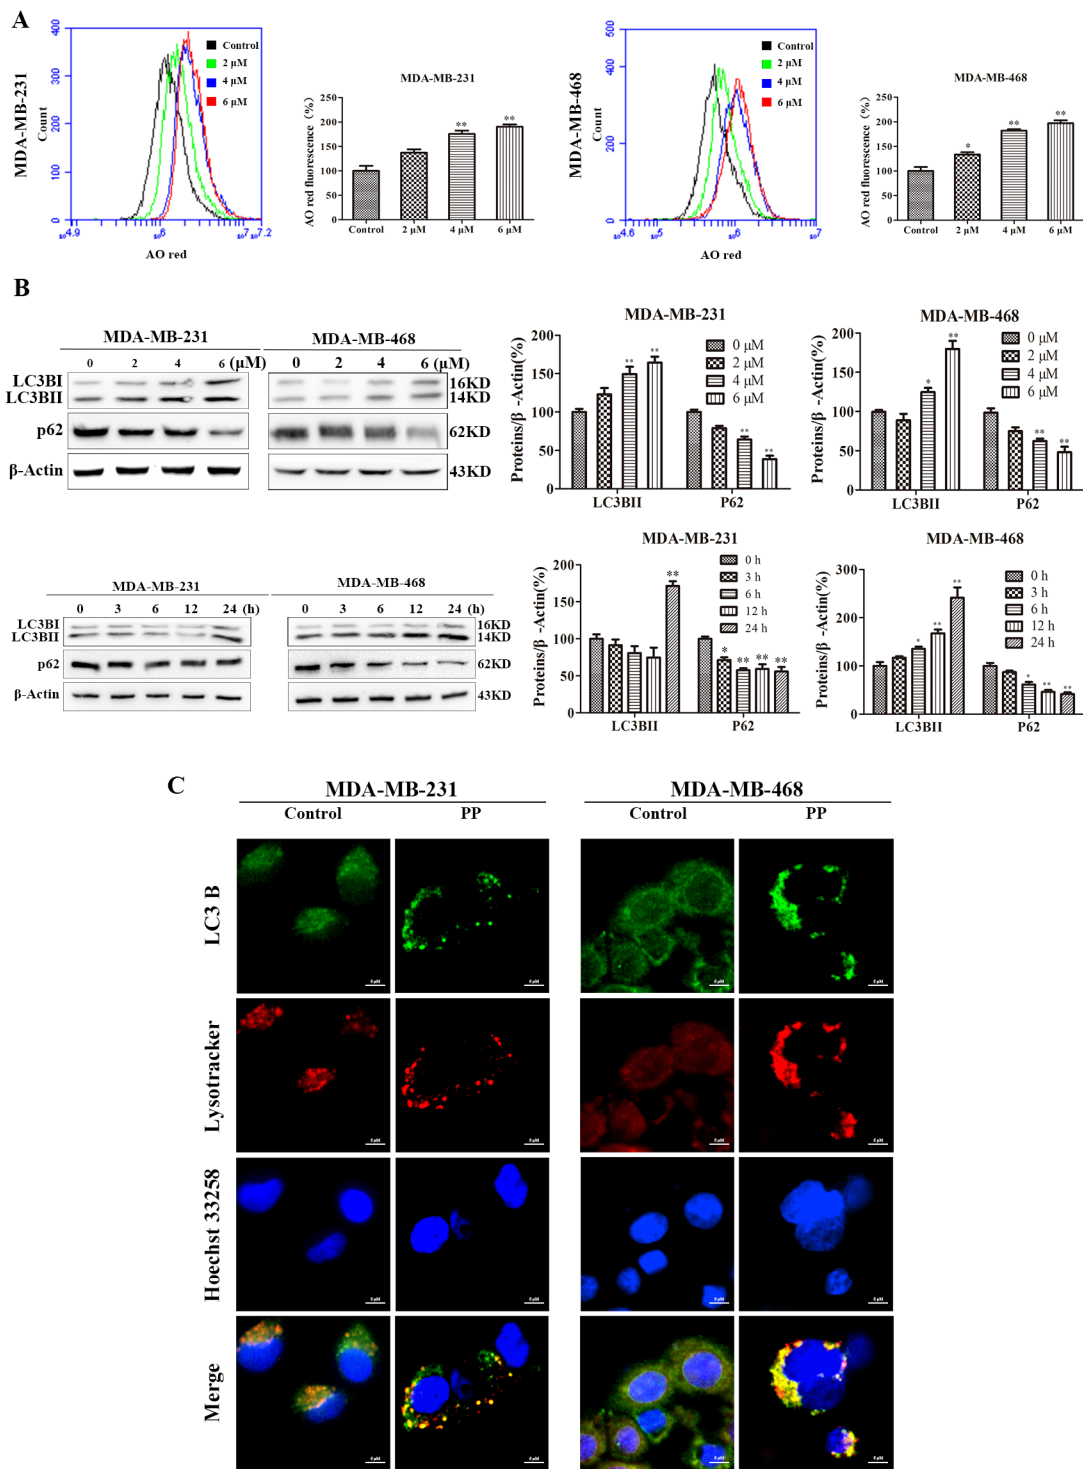

**Figure 5: PP promoted the formation of autophagosome in triple-negative breast cancer cells. (A)** MDA-MB-231 and MDA-MB-468 cells were treated with different concentrations of PP for 24 h, stained with AO and analyzed by flow cytometry. **(B)** Expression levels of LC3BII and p62 by Western blotting in MDA-MB-231 and MDA-MB-468 cells treated with different concentrations of PP and 6  $\mu$ M PP for different periods. **(C)** MDA-MB-231 and MDA-MB-468 cells were treated with 6  $\mu$ M PP for 18 h and analyzed by immunofluorescence. Green: FITC-labeled LC3B; Red: Lyso-Tracker-labeled lysosomes; Blue: Hoechst 33258-labeled nuclei. Scale bars = 5  $\mu$ m. The results were similar in at least three independent experiments. \* $p < 0.05$ , \*\* $p < 0.01$ , vs. control group.

## ROS mediated PP-induced G2/M arrest, apoptosis and autophagy in triple-negative breast cancer cells

ROS normally exists in all aerobic cells in balance with biochemical antioxidants, and this balance can

determine the fate of cancer cells by regulating various signaling pathways, including cell cycle arrest, apoptosis, autophagy and necrosis. As shown in Figure 7A, the ROS level increased in MDA-MB-231 and MDA-MB-468 cells after treatment with different concentrations of PP for 24 h. Next, we applied NAC, a ROS inhibitor, to examine the

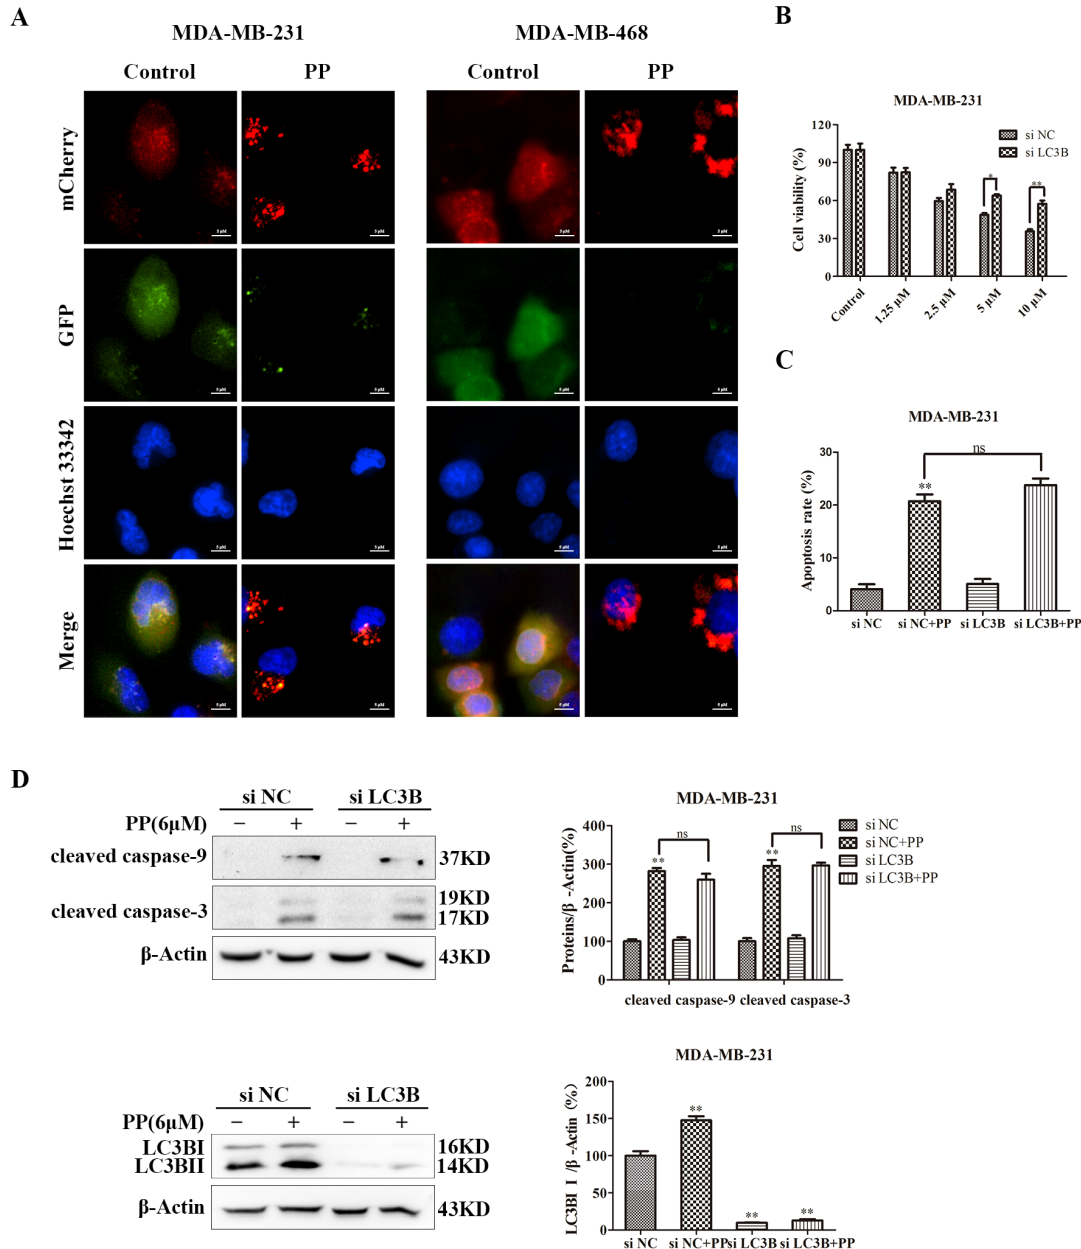

**Figure 6: PP induced autophagic cell growth inhibition in triple-negative breast cancer cells. (A)** Representative images of MDA-MB-231 and MDA-MB-468 cells transfected with Ad-mCherry-GFP-LC3B adenovirus after PP treatment (6 μM, 18 h). Scale bars = 5 μm. **(B)** MDA-MB-231 cells were transfected with 100 nM of LC3B siRNA for 24 h and then treated with different concentrations of PP for 24 h. The viability of MDA-MB-231 cells was then assessed with an MTT assay. **(C)** Apoptotic MDA-MB-231 cells were detected by flow cytometry after treatment with 6 μM PP for 24 h in the presence or absence of LC3B siRNA. **(D)** The protein expression levels of cleaved caspase-9, cleaved caspase-3 and LC3BII in MDA-MB-231 cells transfected with LC3B siRNA in the presence or absence of 6 μM PP. The results were similar in at least three independent experiments. \* $p < 0.05$ , \*\* $p < 0.01$  vs. si NC group.



role of ROS in PP-induced cytotoxicity in MDA-MB-231 and MDA-MB-468 cells. As expected, NAC strongly inhibited PP induced ROS generation (Figure 7B), and NAC also strongly inhibited PP-induced G2/M phase arrest and reversed changes in the expression of G2/M cell cycle regulator proteins (Figure 7C–7D). However, flow cytometry indicated that p21 siRNA failed to restore PP induced ROS generation (Figure 7E). Furthermore, the number of apoptotic cells decreased when MDA-MB-231 and MDA-MB-468 cells were treated with NAC and PP compared with the PP-treated group (Figure 8A). NAC also reversed the PP-induced decrease in the  $\Delta\Psi_m$  (Figure 8B). Furthermore, the changes in cleaved caspase-9, cleaved caspase-7, cleaved caspase-3, cleaved PARP, Bcl-2 and Bax expression were also reversed when MDA-MB-231 and MDA-MB-468 cells were co-incubated with PP and NAC (Figure 8C–8D). With respect to autophagy makers, LC3BII expression decreased and p62 expression increased after treatment with PP and NAC compared with the PP-treated group (Figure 8E). Taken together, these results indicate that PP induces G2/M arrest, autophagy and apoptosis through upregulating ROS in triple-negative breast cancer cells.

### PP induced JNK activation dependent on ROS production

We also investigated the effect of PP on JNK activation, and Figure 9A shows that PP increased the level of JNK phosphorylation in both MDA-MB-231 and MDA-MB-468 cells. We then used a specific JNK siRNA to assess the contribution of activated JNK to PP-induced apoptosis, autophagy or cell cycle arrest and found that the ablation of JNK with siRNA downregulated phospho-JNK in MDA-MB-231 cells, irrespective of PP treatment (Figure 9B). In addition, the number of PP-triggered apoptotic cells decreased when cells were transfected with JNK siRNA compared to the NC siRNA group (Figure 9C). When MDA-MB-231 cells were transfected with JNK siRNA and co-treated with PP, JNK siRNA blocked PP-induced caspase activation (Figure 9D). Similarly, JNK siRNA also blocked the PP-induced decrease in  $\Delta\Psi_m$  and the Bax/Bcl-2 ratio (Figure 9E–9F). Moreover, we found that the ablation of JNK decreased the effect of PP on LC3BII (Figure 9G). However, flow cytometry indicated that JNK siRNA failed to restore the PP-induced increase in G2/M phase arrest (Figure 9H). These results suggest that the activation of JNK is required for PP-induced apoptosis and autophagy but not involved in G2/M phase arrest. Subsequently, the relationship between ROS generation and JNK activation in PP-induced apoptosis and autophagy was investigated by treating of MDA-MB-231 and MDA-MB-468 cells with PP for 24 h alone or in combination with NAC. Changes in phospho-JNK expression were completely reversed when triple-negative breast cancer cells were treated with NAC (Figure 9I). In

addition, JNK siRNA failed to restore PP induced ROS generation (Figure 9J). These results reveal that ROS is the proximal event of JNK and most likely initiates PP-induced apoptosis and autophagy. Thus, PP-induced ROS generation activates JNK signaling to inhibit the growth of triple-negative breast cancer cells.

## DISCUSSION

PP is a novel withanolide compound that was isolated from *Physalis angulate L* at our laboratory, and its analogues have been reported to be cytotoxic to many types of cancer cells via diverse mechanisms [29, 30]. In this study, we investigated the effect of PP on MDA-MB-231 and MDA-MB-468 cells. Our results confirm that PP inhibits proliferation of triple-negative breast cancer cells via G2/M arrest, apoptosis and autophagy mediated by ROS/JNK signaling.

Cell cycle deregulation is a hallmark of cancer, and the induction of cell cycle arrest, especially G2/M phase arrest, may be an effective strategy to treat aberrant cancer cell proliferation [31–33]. The Cyclin B1 and Cdc2 complex, which is rendered inactive by the phosphorylation of Cdc2, plays a key role in promoting the G2/M phase transition [11]. At the initiation of mitosis, cell division cycle protein (Cdc25C) is activated to dephosphorylate of Cdc2 [34, 35], and Cdc25C is phosphorylated by the checkpoint kinases Chk1 and Chk2 and downregulates Cdc25C activity [36, 37]. In addition, p21 plays a critical role in the G2/M checkpoint by inhibiting the Cdc2/cyclinB1 complex [38]. According to our flow cytometric analysis, PP treatment resulted in G2/M phase arrest in triple-negative breast cancer cells. Further Western blotting analyses showed that PP caused G2/M phase arrest by increasing the protein levels of p21 while decreasing the protein levels of Cdc2, phospho-Cdc2, phospho-Cdc25C, Cdc25C and CyclinB1.

Apoptosis is an evolutionarily conserved cell suicide mechanism to eliminate redundant, damaged, or infected cells [39] and can be activated by compounds targeting extrinsic and intrinsic apoptosis pathways [40]. The extrinsic apoptotic pathway involves the interaction of ligands with their respective cell surface death receptors, such as Fas/CD95 and TNFR1, which results in the activation of the proteases caspase-9, caspase-3 and other downstream caspases and the initiation of the apoptotic cascade [41]. Alternatively, the mitochondria-mediated intrinsic pathway may trigger apoptosis. Our results showed that  $\Delta\Psi_m$  sharply decreased after PP treatment, indicating that PP depolarized mitochondria in MDA-MB-231 and MDA-MB-468 cells. Mitochondrial membrane depolarization can release Cyt c from the mitochondrial intramembrane space to the cytosol and activate cytosolic caspases [42–44].

Autophagy, another caspase-independent anti-proliferation pathway, plays a significant role in determining

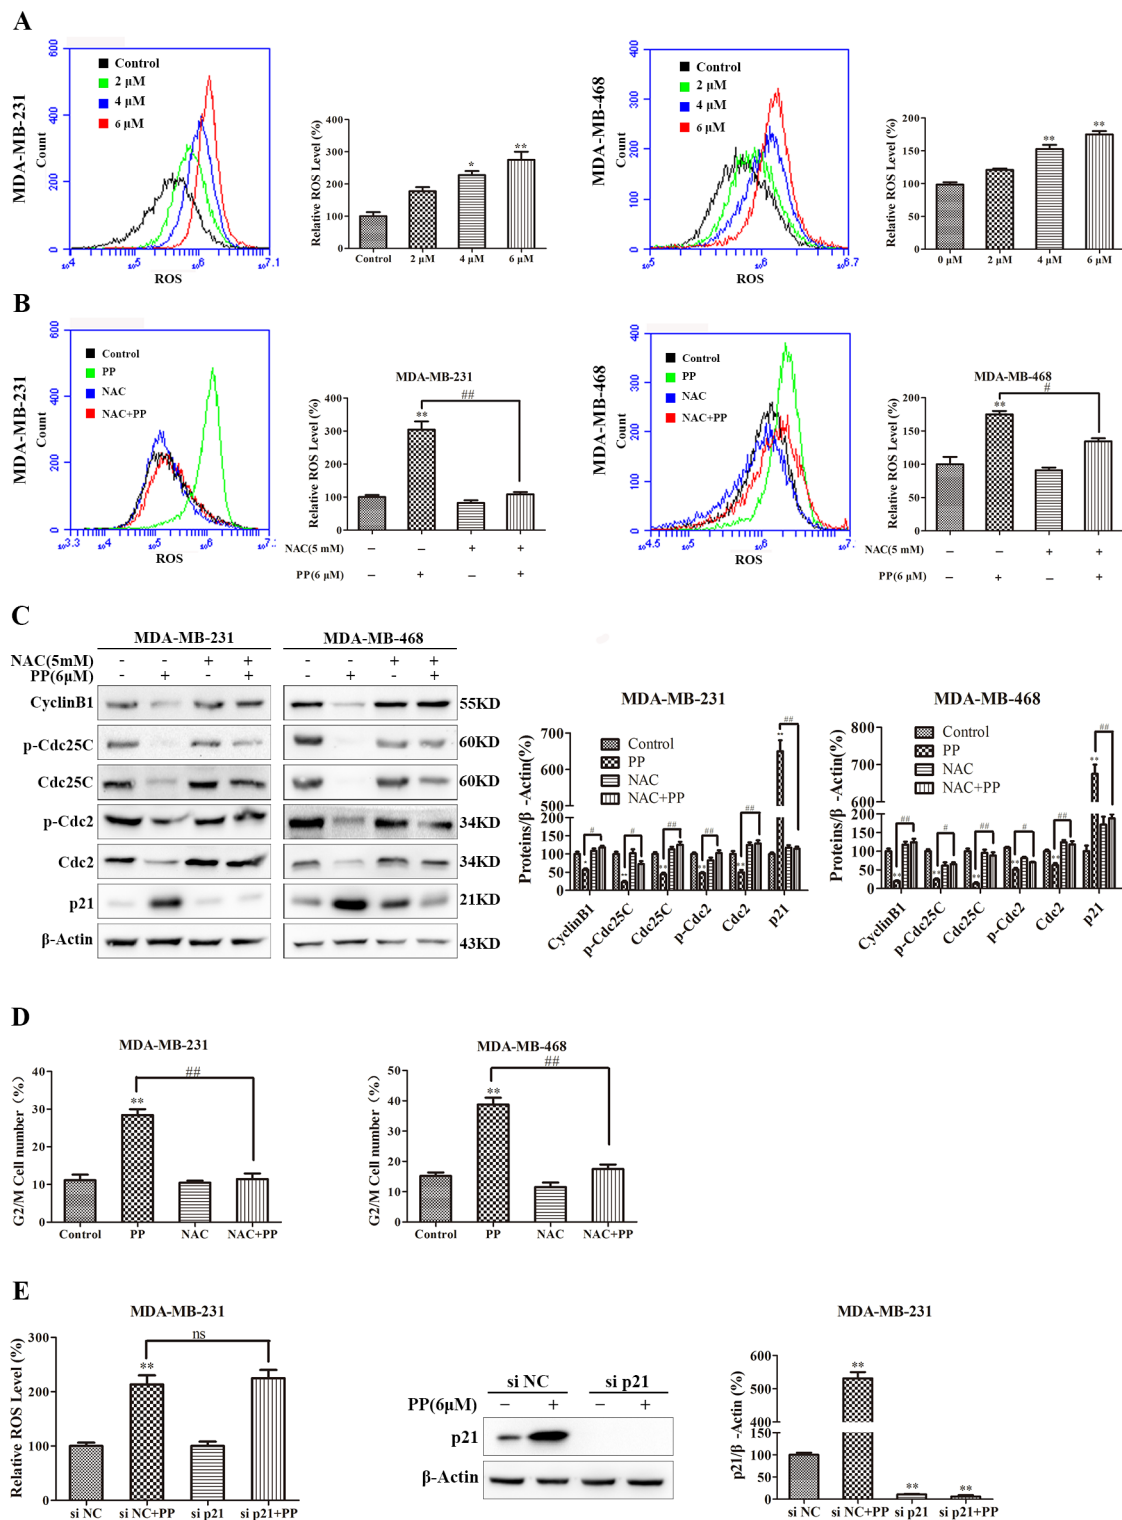

**Figure 7: ROS mediated PP-induced G2/M arrest in triple-negative breast cancer cells.** (A) The ROS levels in MDA-MB-231 and MDA-MB-468 cells incubated with various concentrations of PP for 24 h were measured by flow cytometry. (B) The cells were treated with 6 μM PP alone or in combination with NAC (5 mM) and then subjected to flow cytometry to measure ROS levels. (C) The expression levels of cell cycle-regulated proteins in cells treated with 6 μM PP alone or in combination with NAC were measured by Western blotting. (D) The cell cycle was evaluated by flow cytometry in cells treated with 6 μM PP alone or in combination with NAC. (E) The ROS levels and the protein expression level of p21 in MDA-MB-231 cells transfected with p21 siRNA in the presence or absence of 6 μM PP. The results were similar in at least three independent experiments. \* $p < 0.05$ , \*\* $p < 0.01$ , vs. control group or si NC group; # $p < 0.05$ , ## $p < 0.01$  vs. PP group.

cellular fate [45]. We found that PP induced autophagy, as evidenced by the accumulation of AO-staining acidic vesicles, the formation of autophagy lysosomes observed with an imageXpress® confocal microscope and the upregulation of LC3BII. To further explore the relationship between autophagy and cell growth inhibition, we transfected MDA-MB-231 cells with LC3B siRNA, which showed

that LC3B knockdown markedly attenuated PP-mediated decreases in cell vitality, indicating that autophagy plays an anti-proliferative role. However, the LC3B siRNA-mediated decrease in autophagy did not affect the number of apoptotic cells and protein levels of cleaved caspase-9 and cleaved caspase-3, which indicates that autophagy and apoptosis independently inhibit cell growth.

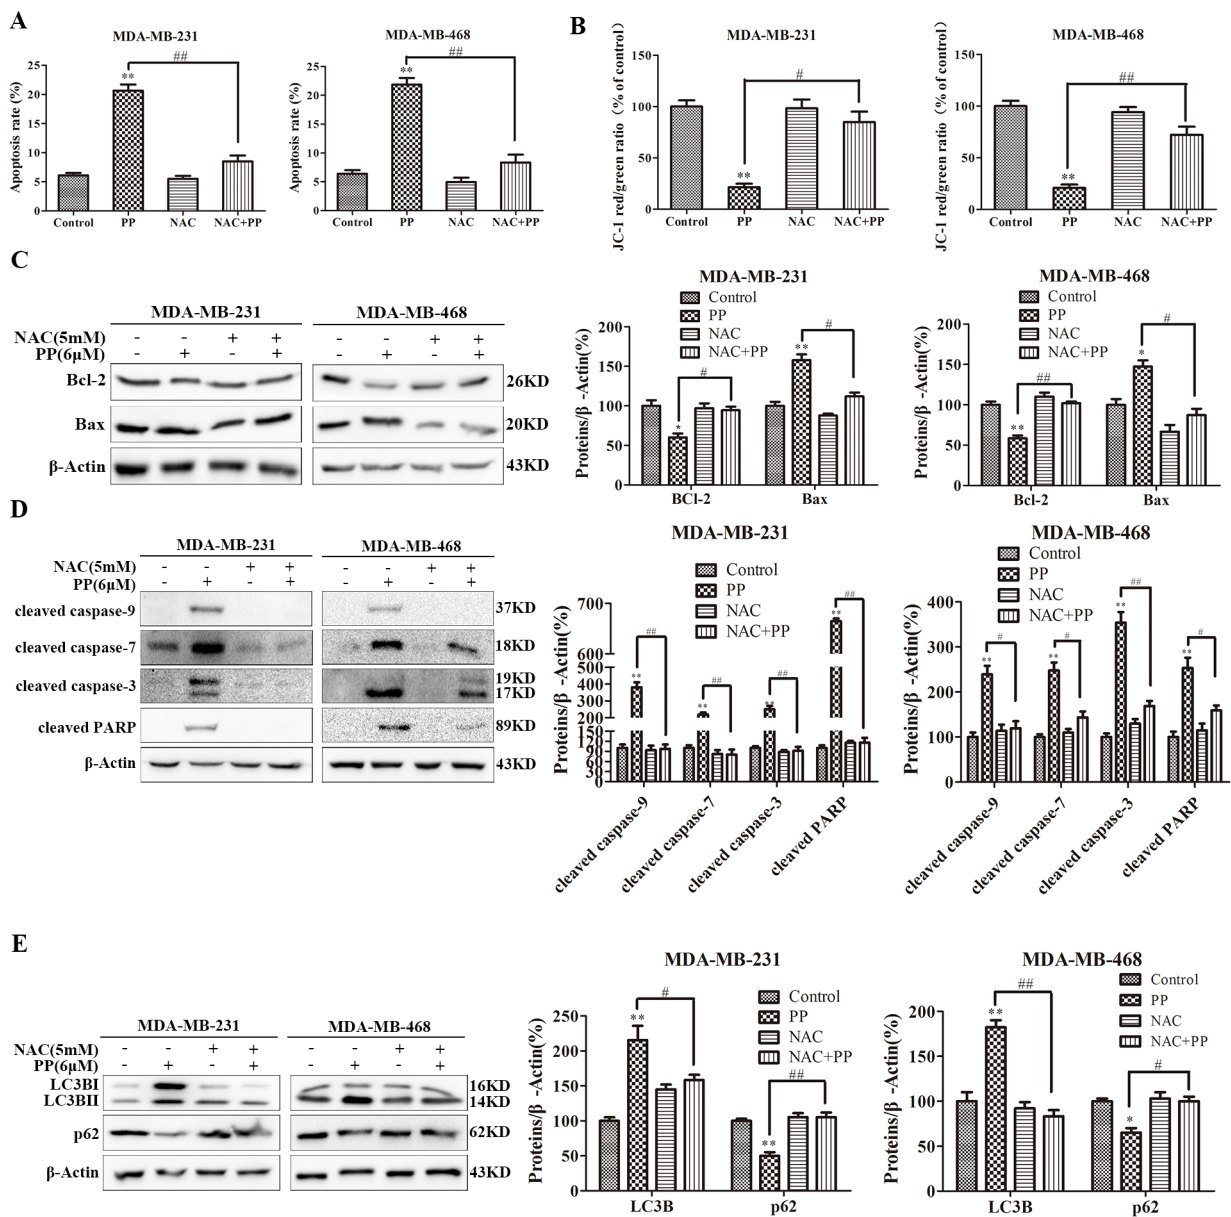

**Figure 8: ROS mediated PP-induced autophagy and apoptosis in triple-negative breast cancer cells.** (A) Apoptosis was measured by flow cytometry with Annexin V- Alexa Fluor 647 and PI staining in cells treated with 6 μM PP alone or in combination with NAC. (B) The changes in mitochondrial membrane potential were assessed by flow cytometry in cells treated with 6 μM PP alone or in combination with NAC. (C) The protein expression levels of Bcl-2 and Bax in MDA-MB-231 and MDA-MB-468 cells treated with PP alone or in combination with NAC. (D) The proteins levels of cleaved caspase-9 and cleaved caspase-7, cleaved caspase-3, and cleaved PARP were measured in MDA-MB-231 and MDA-MB-468 cells treated with PP alone or in combination with NAC. (E) The protein expression levels of LC3BII and p62 were measured in MDA-MB-231 and MDA-MB-468 cells treated with PP alone or in combination with NAC. The results were similar in at least three independent experiments. \* $p < 0.05$ , \*\* $p < 0.01$ , vs. control group; # $p < 0.05$ , ## $p < 0.01$  vs. PP group.

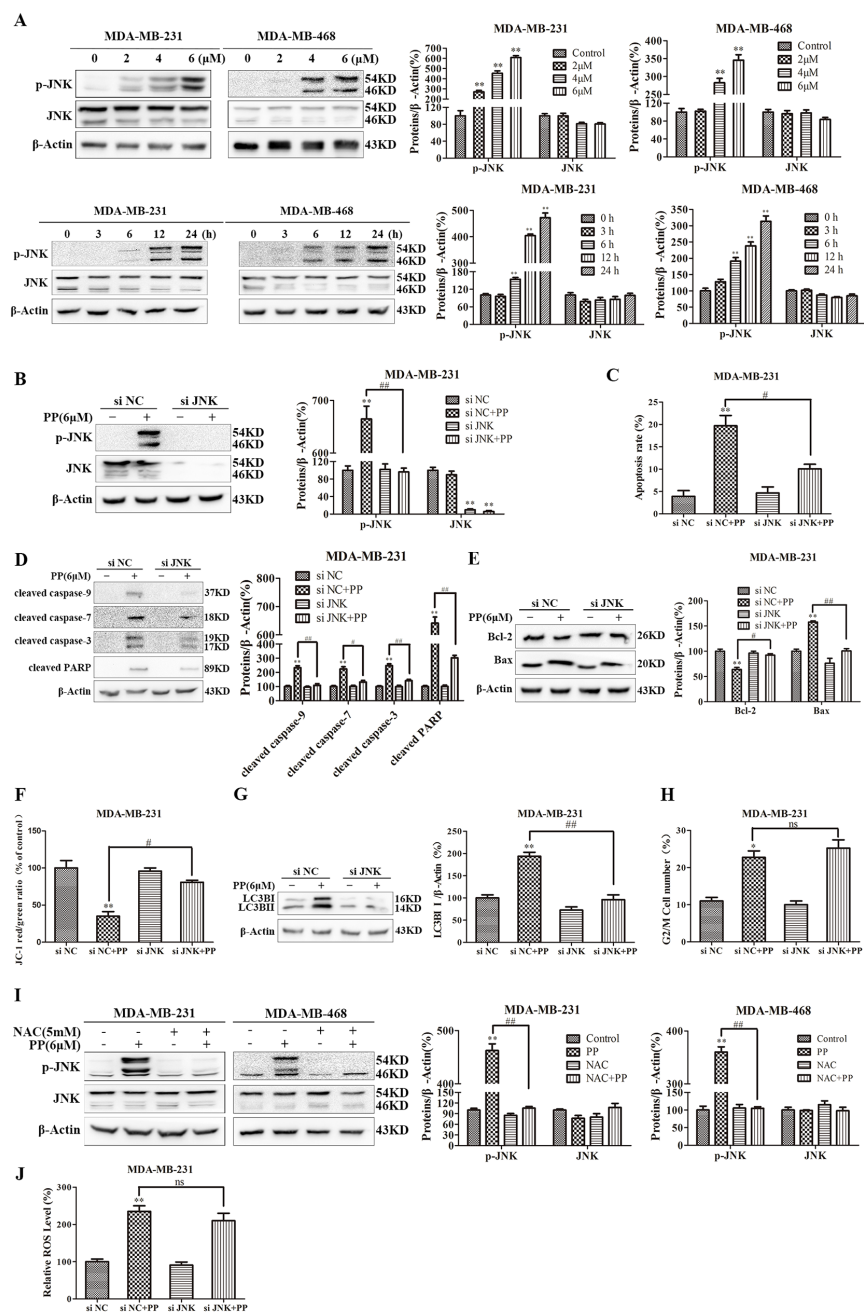

**Figure 9: ROS-mediated JNK activation was crucial mediators of autophagy and apoptosis induced by PP in triple-negative breast cancer cells.** (A) MDA-MB-231 and MDA-MB-468 cells were treated with different concentrations of PP for 24 h and 6 μM PP for different periods, and the expression levels of JNK and phospho-JNK were then measured by Western blotting. (B) The protein expression levels of JNK and phospho-JNK in MDA-MB-231 cells transfected with JNK siRNA in the presence or absence of 6 μM PP. (C) Apoptotic MDA-MB-231 cells were measured by flow cytometry after treatment with 6 μM PP for 24 h in the presence or absence of JNK siRNA. (D) The protein levels of cleaved caspase-9, cleaved caspase-7, cleaved caspase-3 and cleaved PARP in MDA-MB-231 cells transfected with JNK siRNA in the presence or absence of 6 μM PP. (E) The protein expression levels of Bax and Bcl-2 in MDA-MB-231 cells transfected with JNK siRNA in the presence or absence of 6 μM PP. (F) The changes in mitochondrial membrane potential in MDA-MB-231 cells were assessed by flow cytometry after treatment with 6 μM PP for 24 h in the presence or absence of JNK siRNA. (G) The protein expression levels of LC3BII in MDA-MB-231 cells transfected with JNK siRNA in the presence or absence of 6 μM PP. (H) The cell cycle was assessed by flow cytometry in MDA-MB-231 cells after treatment with 6 μM PP for 24 h in the presence or absence of JNK siRNA. (I) The protein levels of JNK and phospho-JNK in MDA-MB-231 and MDA-MB-468 cells treated with PP alone or in combination with NAC. (J) The ROS levels in MDA-MB-231 cells were detected by flow cytometry after treatment with 6 μM PP for 24 h in the presence or absence of JNK siRNA. The results were similar in at least three independent experiments. \* $p < 0.05$ , \*\* $p < 0.01$ , vs. control group or si NC group; # $p < 0.05$ , ## $p < 0.01$  vs. PP/si NC+PP group.



The generation of ROS in MDA-MB-231 and MDA-MB-468 cells is a striking feature of PP-induced apoptosis and autophagy. Specifically, ROS are important signaling molecules that regulate many signal-transduction pathways [46–48], and excessive ROS generation may interfere with cellular signaling pathways and play critical roles in inducing both cell apoptosis and autophagy [49, 50]. Furthermore, emerging evidences illustrated that natural compounds such as Physalin A [51], withaferin A [27] and celastrol [11] can cause ROS-mediated apoptosis and autophagy due to their structure of  $\alpha$ ,  $\beta$ -unsaturated ketone moieties [52]. PP also has an  $\alpha$ ,  $\beta$ -unsaturated ketone moiety, thus we hypothesized that PP-induced apoptosis and autophagy may be mediated by ROS. In this study, PP significantly increased ROS generation in MDA-MB-231 and MDA-MB-468 cells, and the ROS inhibitor NAC reversed the PP-induced inhibition of cell proliferation. NAC blocked PP-induced G2/M arrest, apoptosis and autophagy in MDA-MB-231 and MDA-MB-468 cells, suggesting that PP affected cell proliferation via the ROS-mediated modulation of the cell cycle, apoptosis and autophagy.

JNK, a member of the MAPK family, transduces cellular signals in response to different physiological stimuli

and stresses [49]. To explore the relationship between ROS and JNK as well as their role in G2/M phase arrest, the ability of PP to activate JNK was investigated. PP induced ROS production in MDA-MB-231 and MDA-MB-468, which strongly activated JNK (phosphorylation). Moreover, NAC almost completely reversed the PP-induced inhibition of apoptosis and autophagy, and JNK siRNA significantly attenuated these two processes. NAC, but not JNK siRNA, also strongly blocked G2/M phase arrest, indicating that ROS, but not JNK, mediated PP-induced cell cycle arrest. In addition, NAC completely blocked JNK phosphorylation, implying that ROS is the proximal event of JNK signaling. In summary, our studies provide experimental evidence to support that PP induces apoptosis and autophagy via the ROS/JNK signaling pathway and that ROS play a vital role in G2/M phase arrest caused by PP.

Our study showed that PP suppresses cell proliferation in triple-negative breast cancer cells by causing G2/M phase arrest, apoptosis and autophagy. In addition, PP induced apoptosis and autophagy by activating ROS/JNK signaling. Moreover, inhibiting autophagy with LC3B siRNA attenuated PP-induced cell growth inhibition, indicating that PP-induced autophagy is an anti-proliferative process in cells (Figure 10). These

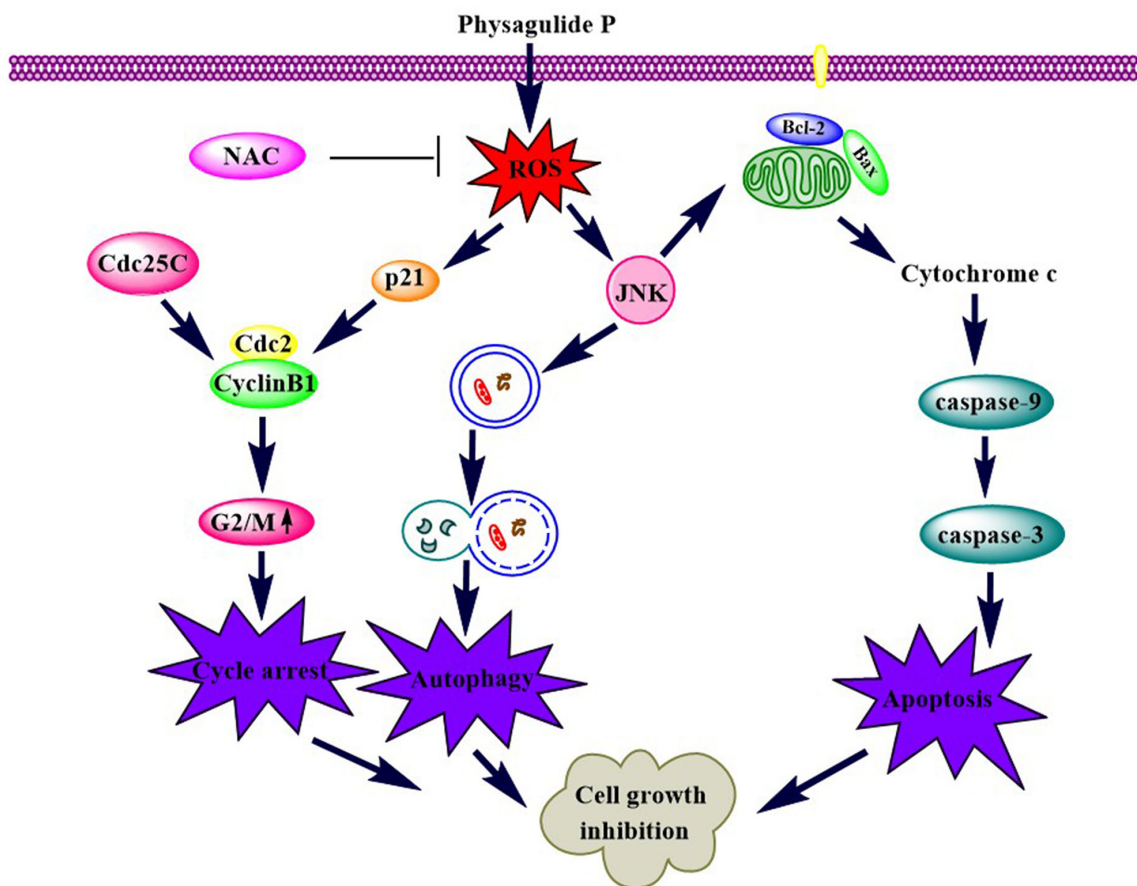

Figure 10: A schematic diagram of the pathways by which PP inhibits cell growth in triple-negative breast cancer.

findings revealed multiple cytotoxic mechanisms for PP and demonstrated its potential for the treatment of triple-negative breast cancer cells.

## MATERIALS AND METHODS

### Cell culture and reagents

The triple-negative breast cancer cell lines MDA-MB-231 and MDA-MB-468 were purchased from the Cell Bank of the Shanghai Institute of Biochemistry and Cell Biology at the Chinese Academy of Sciences (Shanghai, China). MDA-MB-231 and MDA-MB-468 were cultured in DMEM and L-15 media, respectively. The media were supplemented with 10% fetal bovine serum, 50 µg/ml penicillin and 50 µg/ml streptomycin at 37 °C and 5% CO<sub>2</sub> in a humidified environment.

PP was isolated from *Physalis angulata L.* at our laboratory, and samples containing at least 95% PP were used in all of our experiments (Supplementary Figure 1). PP was dissolved in dimethyl sulfoxide (DMSO) to obtain a stock solution of 50 mM and stored at 4 °C. Before each experiment, the stock solution of PP was diluted with medium to different working concentrations, and control groups were treated with the same amount of DMSO (< 0.1%) in the corresponding experiments. Antibodies against Cyclin B1, Cdc2, Phospho-Cdc2 (Tyr15), Cdc25C (5H9, rabbit mAb), Phospho-Cdc25C (Ser216, rabbit mAb), p21, cleaved caspase-9 (Asp175, rabbit mAb), caspase-9, cleaved caspase-7 (Asp198), caspase-7, cleaved caspase-3 (Asp330), caspase-3, cleaved PARP (Asp214), PARP, LC3B (rabbit mAb), p62/SQSTM1 (rabbit mAb), Bax (D2E11, rabbit mAb), Bcl-2 (D55G8, rabbit mAb), phospho-SAPK/JNK (Thr183/Thr185, rabbit mAb), and SAPK/JNK (rabbit mAb) were purchased from Cell Signaling Technology (Danvers, MA, USA). β-Actin was purchased from Vazyme (Nanjing, China).

### Cell viability and tumor colony forming assays

MDA-MB-231 and MDA-MB-468 cells were treated with various concentrations of PP or 0.1% DMSO. Cell viability and tumor colony formation assays were performed as previously described [49].

### CFDA-SE cell tracer kit

MDA-MB-231 and MDA-MB-468 cells were labeled with CFDA-SE, plated in a 6-well plate and incubated overnight. The cells were then treated with different concentrations PP for 24 h before being harvested and washed twice with PBS. The fluorescence intensity was then measured with a BD Accuri C6 flow cytometer (Becton & Dickinson Co.).

### EdU incorporation assay

MDA-MB-231 and MDA-MB-468 cells were treated with various concentrations of PP or 0.1% DMSO. The EdU incorporation assay was performed using an EdU labeling/detection kit (Ribobio, Guangzhou, China). The operating methods were performed as previously described [53]. The cells were subsequently observed with an imageXpress® confocal microscope (Molecular Devices, USA).

### Annexin V-alexa fluor 647/PI staining assay for cell apoptosis

MDA-MB-231 and MDA-MB-468 cells that underwent apoptosis were evaluated via flow cytometry. Briefly, MDA-MB-231 and MDA-MB-468 cells were treated with various concentrations of PP or 0.1% DMSO for 24 h. For flow cytometry, 1 × 10<sup>6</sup> cells in 250 µl of binding buffer were stained with 5 µl of Annexin V-Alexa Fluor 647 and 10 µl of PI at room temperature in the dark for 15 min. The cells were then analyzed via flow cytometry (488 nm excitation and 647 nm emission filters) using BD Accuri C6 flow cytometer.

### Cell cycle analysis

In brief, after treatment with different concentrations of PP, the cells were harvested and fixed with 70% ethanol at -20 °C overnight. The cells were then stained with PI/RNase Staining Buffer (Beyotime, Shanghai, China) for 15 min and analyzed with a BD Accuri C6 flow cytometer.

### Measurement of ROS

To measure the intracellular ROS levels, MDA-MB-231 and MDA-MB-468 cells were pretreated with various concentrations of PP or 0.1% DMSO for 24 h and then incubated in the dark with 10 mM of the oxidation-sensitive fluorescent probe 2',7'-dichlorofluorescein diacetate (DCFH-DA, Beyotime) for 20 min at 37 °C. DCFH-DA was cleaved by intracellular esterase to liberate free DCFH, and the ROS level was measured using a BD Accuri C6 flow cytometer.

### Measurement of the $\Delta\Psi_m$

$\Delta\Psi_m$  was assessed with a JC-1 assay kit (KeyGen Biotech, Nanjing, China) as previously described [54]. Mitochondrial depolarization was measured by a decrease in the red/green fluorescence intensity ratio.

### Acridine orange (AO) staining

MDA-MB-231 and MDA-MB-468 cells were seeded in a 6-well plate and incubated with various concentrations of PP for 24 h. The cells were then harvested and stained

with AO for 15 min. After washing with PBS, the cells were analyzed with a BD Accuri C6 flow cytometer.

### LC3B immunofluorescence

MDA-MB-231 and MDA-MB-468 cells were plated in 96-well culture plates at a density of  $2 \times 10^4$  cells per well and treated with different concentrations of PP for 18 h. The cells were then washed with PBS containing 0.05% saponin, fixed with 4% paraformaldehyde for 30 min, incubated with 0.5% Triton X-100 for 10 min and blocked with 5% BSA for 1 h. The cells were then incubated with antibodies against LC3B (Cell Signaling Technology, 1:50) overnight at 4 °C; the nuclei were stained with Hoechst 33258 (Yeasen Biotechnology, Shanghai, China), and lysosomes were stained with LysoTracker for 30 min before imaging. Finally, images were taken with an imageXpress® confocal microscope.

### Ad-mCherry-GFP-LC3B transfection

Cells were grown on 96-well plates until they reached 60%–70% confluence and then transfected with Ad-mCherry-GFP-LC3B adenovirus (Beyotime) at an MOI of 30 for 6 h at 37 °C. Following treatment with PP for 18 h, the cells were stained with Hoechst 33342 (Yeasen). Finally, images were taken with an imageXpress® confocal microscope.

### Western blotting analysis

MDA-MB-231 and MDA-MB-468 cells were lysed in western blotting lysis buffer and centrifuged at 12000 rpm for 10 min. Proteins were extracted for western blot as previously described [55]. Bound immuno-complexes were detected with a ChemiDOC™ (Bio-Rad Laboratories, Hercules, CA).

### Gene knockdown using small interfering RNA

JNK siRNA [56], LC3B siRNA [57], p21 siRNA pools (siRNA1: CAGGCGGUUAUGAAAUCAdTdT, siRNA2: GAUGGAACUUCGACUUUGUdTdT and siRNA3: CCUCUGGCAUUAGAAUUAUdTdT) and non-targeting siRNA were synthesized by Biomics (Nantong, China). For siRNA transfection, MDA-MB-231 cells were seeded in 6-well plates or glass-bottom dishes ( $1 \times 10^6$  cells per well). SiRNAs (100 nmol/l) were introduced into the cells using electroporation according to the manufacturer's recommendations. The cells were then exposed to medium containing various concentrations of PP and harvested for further experiments.

### Cyt c immunofluorescence

MDA-MB-231 and MDA-MB-468 cells growing in glass-bottom dishes were treated with different

concentrations of PP for 24 h. The cells were then fixed in 4% paraformaldehyde, washed with PBS, incubated with 0.5% Triton X-100 and blocked with 5% BSA. The cells were then incubated with primary antibodies against Cyt c (Cell Signaling Technology, 1:200) overnight at 4 °C, followed by incubation with Alexa Fluor 488-conjugated secondary antibody (Yeasen) for 2 h at room temperature in the dark. The nuclei were stained with Hoechst 33258, and lysosomes were stained with Mitotracker for 30 min before imaging. A laser scanning confocal microscope LSM 700 was used to analyze co-localization (LSM700, Carl Zeiss, Germany).

### Statistical analysis

All experiments were conducted more than three times. The results were analyzed using a one-way or two-way ANOVA followed by Tukey's range test. The data are presented as the mean  $\pm$  standard error, and significance was set to  $p < 0.05$ .

### Abbreviations

PP, physagulide P; ROS, reactive oxygen species; JNK, c-Jun N-terminal kinases; ER, estrogen receptor; PR, progesterone receptor; CDKs, cyclin-dependent kinases; PCD, programmed cell death; SAPK: stress-activated protein kinase; AVOS: acidic vesicular organelles; CFDA-SE, carboxyfluorescein diacetate, succinimidyl ester; DMSO, dimethyl sulfoxide; MTT, 3-[4, 5-dimethylthiazole-2-yl]-2, 5-diphenyltetrazolium bromide; EdU, 5-ethynyl-20-deoxyuridine; PI, propidium iodide; DCFH-DA, 2',7'-dichlorofluorescein-diacetate;  $\Delta\Psi_m$ , mitochondrial membrane potential; AO, acridine orange.

### Author contributions

PY and CZ conceived or designed the experiments, performed the experiments, wrote the manuscript, and analyzed the data. TM performed the experiments and analyzed the data. HZ performed the experiments. YY analyzed the data. CG and MZ provided the tested drugs. LY analyzed the data and wrote the manuscript. LK conceived or designed the experiments. All authors read and approved the final manuscript.

### ACKNOWLEDGMENTS

We thank the Cellular and Molecular Biology Center of China Pharmaceutical University for Assistance with confocal microscopy work and we are grateful to Xiao-Nan Ma for her technical help.

### CONFLICTS OF INTEREST

The authors have no conflicts of interest.



## FUNDING

This work was supported by the National Natural Science Foundation of China (NO. 81673554 and 81503211), the Project Funded by the Priority Academic Program Development of Jiangsu Higher Education Institutions (PAPD) and the Program for Changjiang Scholars and Innovative Research Team in University (IRT\_15R63).

## REFERENCES

1. Auguste A, Cortet M, Dabakuyo-Yonli TS, Launay L, Arnould L, Desmoulins I, Roignot P, Darut-Jouve A, Poillot ML, Bertaut A, Arveux P. Breast cancer subtype of French women is not influenced by socioeconomic status: a population-based-study. *PLoS One*. 2017; 12:e0170069.
2. Anampa J, Makower D, Sparano JA. Progress in adjuvant chemotherapy for breast cancer: an overview. *BMC Med*. 2015; 13:195.
3. Xu YL, Yao R, Li J, Zhou YD, Mao F, Pan B, Sun Q. FOXC1 overexpression is a marker of poor response to anthracycline-based adjuvant chemotherapy in sporadic triple-negative breast cancer. *Cancer Chemother Pharmacol*. 2017; 79:1205-1213.
4. Chen B, Wang J, Dai D, Zhou Q, Guo X, Tian Z, Huang X, Yang L, Tang H, Xie X. AHNAK suppresses tumour proliferation and invasion by targeting multiple pathways in triple-negative breast cancer. *J Exp Clin Cancer Res*. 2017; 36:65.
5. Jin J, Zhang W, Ji W, Yang F, Guan X. Predictive biomarkers for triple negative breast cancer treated with platinum-based chemotherapy. *Cancer Biol Ther*. 2017;1-10.
6. Ogasawara S, Chiba T, Ooka Y, Suzuki E, Kanogawa N, Saito T, Motoyama T, Tawada A, Kanai F, Yokosuka O. Post-progression survival in patients with advanced hepatocellular carcinoma resistant to sorafenib. *Invest New Drugs*. 2016; 34:255-260.
7. Ran W, Qian Z, Xin P, Chang Z, Zhong Y, Xi C, Qiu Y, Jin M, Min G, Kong D. Stelletin B induces G1 arrest, apoptosis and autophagy in human non-small cell lung cancer A549 cells via blocking PI3K/Akt/mTOR pathway. *Sci Rep*. 2016; 6:27071.
8. Huang WW, Ko SW, Tsai HY, Chung JG, Chiang JH, Chen KT, Chen YC, Chen HY, Chen YF, Yang JS. Cantharidin induces G2/M phase arrest and apoptosis in human colorectal cancer colo 205 cells through inhibition of CDK1 activity and caspase-dependent signaling pathways. *Int J Oncol*. 2011; 38:1067.
9. Chen F, Li H, Wang Y, Gao M, Cheng Y, Liu D, Jia M, Zhang J. Inhibition of allicin in Eca109 and EC9706 cells via G2/M phase arrest and mitochondrial apoptosis pathway. *J Funct Foods*. 2016; 25:523-536.
10. Duangprompo W, Aree K, Itharat A, Hansakul P. Effects of 5,6-dihydroxy-2,4-dimethoxy-9,10-dihydrophenanthrene on G2/M cell cycle arrest and apoptosis in human lung carcinoma cells. *Am J Chin Med*. 2016; 44:1473-1490.
11. Li HY, Zhang J, Sun LL, Li BH, Gao HL, Xie T, Zhang N, Ye ZM. Celastrol induces apoptosis and autophagy via the ROS/JNK signaling pathway in human osteosarcoma cells: an *in vitro* and *in vivo* study. *Cell Death Dis*. 2015; 6:e1604.
12. Paterna A, Gomes SE, Borralho PM, Mulhovo S, Rodrigues CM, Ferreira MJ. Vobasinyl-Iboga alkaloids from *tabernaemontana elegans*: cell cycle arrest and apoptosis-inducing activity in HCT116 colon cancer cells. *J Nat Products*. 2016; 79:2624-2634.
13. Green DR. Apoptotic pathways: ten minutes to dead. *Cell*. 2005; 121:671.
14. Burgess DJ. Apoptosis: refined and lethal. *Nat Rev Cancer*. 2013; 13:79.
15. Sun H, Zou S, Candiotti KA, Peng Y, Zhang Q, Xiao W, Wen Y, Wu J, Yang J. Octreotide attenuates acute kidney injury after hepatic ischemia and reperfusion by enhancing autophagy. *Sci Rep*. 2017; 7:42701.
16. Kumar B, Iqbal MA, Singh RK, Bamezai RNK. Resveratrol inhibits TIGAR to promote ROS induced apoptosis and autophagy. *Biochimie*. 2015; 118:26-35.
17. Klionsky DJ, Abdalla FC, Ahn HJ, Aitmohamed O, Aitsiali S, Akematsu T, Akira S, Alyounes HM, Alzeer MA, Albert ML. Guidelines for the use and interpretation of assays for monitoring autophagy | NOVA. The University of Newcastle's Digital Repository. *Autophagy*. 2012; 8:445-544.
18. Kaminsky VO, Zhivotovsky B. Free radicals in cross talk between autophagy and apoptosis. *Antioxid Redox Signal*. 2014; 21:86-102.
19. Yang L, Yuan Y, Fu C, Xu X, Zhou J, Wang S, Kong L, Li Z, Guo Q, Wei L. LZ-106, a novel analog of enoxacin, inducing apoptosis via activation of ROS-dependent DNA damage response in NSCLCs. *Free Radic Biol Med*. 2016; 95:155-168.
20. Shen HM, Liu ZG. JNK signaling pathway is a key modulator in cell death mediated by reactive oxygen and nitrogen species. *Free Radic Biol Med*. 2006; 40:928-939.
21. Avisetti DR, Babu KS, Kalivendi SV. Activation of p38/JNK pathway is responsible for embelin induced apoptosis in lung cancer cells: transitional role of reactive oxygen species. *PLoS One*. 2014; 9:e87050.
22. Kyriakis JM, Banerjee P, Nikolakaki E, Dai T, Rubie EA, Ahmad MF, Avruch J, Woodgett JR. The stress-activated protein kinase subfamily of c-Jun kinases. *Nature*. 1994; 369: 156-160.
23. Tsujimoto Y, Shimizu S. Another way to die: autophagic programmed cell death. *Cell Death Differ*. 2005; 12:1528-1534.
24. Suman S, Das TP, Sirimulla S, Alatassi H, Ankem MK, Damodaran C. Withaferin-A suppress AKT induced



- tumor growth in colorectal cancer cells. *Oncotarget*. 2016; 7:13854-13864. doi: 10.18632/oncotarget.7351.
25. Lv TZ, Wang GS. Antiproliferation potential of withaferin A on human osteosarcoma cells via the inhibition of G2/M checkpoint proteins. *Exp Ther Med*. 2015; 10:323-329.
  26. Das T, Roy KS, Chakrabarti T, Mukhopadhyay S, Roychoudhury S. Withaferin A modulates the Spindle assembly checkpoint by degradation of Mad2-Cdc20 complex in colorectal cancer cell lines. *Biochem Pharmacol*. 2014; 91:31-39.
  27. Li X, Zhu F, Jiang J, Sun C, Wang X, Shen M, Tian R, Shi C, Xu M, Peng F, Guo X, Wang M, Qin R. Synergistic antitumor activity of withaferin A combined with oxaliplatin triggers reactive oxygen species-mediated inactivation of the PI3K/AKT pathway in human pancreatic cancer cells. *Cancer Lett*. 2015; 357:219-230.
  28. Sun L, Liu J, Cui D, Li J, Yu Y, Ma L, Hu L. Anti-inflammatory function of Withangulatin A by targeted inhibiting COX-2 expression via MAPK and NF-kappaB pathways. *J Cell Biochem*. 2010; 109:532-541.
  29. Wu SY, Leu YL, Chang YL, Wu TS, Kuo PC, Liao YR, Teng CM, Pan SL. Physalin F induces cell apoptosis in human renal carcinoma cells by targeting NF-kappaB and generating reactive oxygen species. *PLoS One*. 2012; 7:e40727.
  30. Hsu CC, Wu YC, Farh L, Du YC, Tseng WK, Wu CC, Chang FR. Physalin B from *Physalis angulata* triggers the NOXA-related apoptosis pathway of human melanoma A375 cells. *Food Chem Toxicol*. 2012; 50:619-624.
  31. Chen MC, Chen CH, Liu YN, Wang HP, Pan SL, Teng CM. TW01001, a novel piperazinedione compound, induces mitotic arrest and autophagy in non-small cell lung cancer A549 cells. *Cancer Lett*. 2013; 336:370-378.
  32. Zhao B, Ma Y, Xu Z, Wang J, Wang F, Wang D, Pan S, Wu Y, Pan H, Xu D. Hydroxytyrosol, a natural molecule from olive oil, suppresses the growth of human hepatocellular carcinoma cells via inactivating AKT and nuclear factor-kappa B pathways. *Cancer Lett*. 2014; 347:79-87.
  33. Hanahan D, Weinberg R. Hallmarks of cancer: the next generation. *Cell*. 2011; 144:646-674.
  34. Kastan, Amp MB, Bartek J. Review article Cell-cycle checkpoints and cancer. *Nature*. 2004; :316-323.
  35. Takizawa CG, Morgan DO. Control of mitosis by changes in the subcellular location of cyclin-B1-Cdk1 and Cdc25C. *Curr Opin Cell Biol*. 2000; 12:658.
  36. Huang H, Hu M, Zhao R, Li P, Li M. Dihydromyricetin suppresses the proliferation of hepatocellular carcinoma cells by inducing G2/M arrest through the Chk1/Chk2/Cdc25C pathway. *Oncol Rep*. 2013; 30:2467-2475.
  37. Ma YC, Su N, Shi XJ, Zhao W, Ke Y, Zi X, Zhao NM, Qin YH, Zhao HW, Liu HM. Jaridinin-induced G2/M phase arrest in human esophageal cancer cells is caused by reactive oxygen species-dependent Cdc2-tyr15 phosphorylation via ATM-Chk1/2-Cdc25C pathway. *Toxicol Appl Pharmacol*. 2015; 282:227-236.
  38. Wang G, Zhang T, Sun W, Wang H, Yin F, Wang Z, Zuo D, Sun M, Zhou Z, Lin B, Xu J, Hua Y, Li H, Cai Z. Arsenic sulfide induces apoptosis and autophagy through the activation of ROS/JNK and suppression of Akt/mTOR signaling pathways in osteosarcoma. *Free Radic Biol Med*. 2017; 106:24-37.
  39. Kerr JF, Wyllie AH, Currie AR. Apoptosis: a basic biological phenomenon with wide-ranging implications in tissue kinetics. *Br J Cancer*. 1972; 26:239-257.
  40. Ke B, Tian M, Li J, Liu B, He G. Targeting programmed cell death using small-molecule compounds to improve potential cancer therapy. *Med Res Rev*. 2016; 36:983-1035.
  41. Wang Z, Liu M, Zhu H, Zhang W, He S, Hu C, Quan L, Bai J, Xu N. miR-106a is frequently upregulated in gastric cancer and inhibits the extrinsic apoptotic pathway by targeting FAS. *Mol Carcinogen*. 2013; 52:634.
  42. Fesik SW. Promoting apoptosis as a strategy for cancer drug discovery. *Nat Rev Cancer*. 2005; 5:876-885.
  43. Daugas E, Nochy D, Ravagnan L, Loeffler M, Susin S, Zamzami N, Kroemer G. Apoptosis-inducing factor (AIF): a ubiquitous mitochondrial oxidoreductase involved in apoptosis. *FEBS Lett*. 2000; 476:118.
  44. Krick S, Platoshyn O, Mcdaniel SS, Rubin LJ, Yuan JX. Augmented K(+) currents and mitochondrial membrane depolarization in pulmonary artery myocyte apoptosis. *Am J Physiol Lung Cell Mol Physiol*. 2001; 281:L887.
  45. Ouyang L, Shi Z, Zhao S, Wang FT, Zhou TT, Liu B, Bao JK. Programmed cell death pathways in cancer: a review of apoptosis, autophagy and programmed necrosis. *Cell Prolif*. 2012; 45:487.
  46. Ray PD, Bo-Wen H, Yoshiaki T. Reactive oxygen species (ROS) homeostasis and redox regulation in cellular signaling. *Cell Signal*. 2012; 24:981.
  47. Jiao Y, Zhang Y, Wei Y, Liu Z, An W, Guo M. Direct observation of internalization and ROS generation of amyloid  $\beta$ -peptide in neuronal cells at subcellular resolution. *Chembiochem*. 2012; 13:2335-2338.
  48. Yang C, Lim W, Bazer FW, Song G. Myricetin suppresses invasion and promotes cell death in human placental choriocarcinoma cells through induction of oxidative stress. *Cancer Lett*. 2017; 399:10-19.
  49. Zhang C, Yang L, Wang XB, Wang JS, Geng YD, Yang CS, Kong LY. Calyxin Y induces hydrogen peroxide-dependent autophagy and apoptosis via JNK activation in human non-small cell lung cancer NCI-H460 cells. *Cancer Lett*. 2013; 340:51-62.
  50. Ling LU, Tan KB, Lin H, Chiu GNC. The role of reactive oxygen species and autophagy in safinol-induced cell death. *Cell Death Dis*. 2011; 2:e129.
  51. Kang N, Jian JF, Cao SJ, Zhang Q, Mao YW, Huang YY, Peng YF, Qiu F, Gao XM. Physalin A induces G2/M phase cell cycle arrest in human non-small cell lung cancer cells:

- involvement of the p38 MAPK/ROS pathway. *Mol Cell Biochem.* 2016; 415:145-155.
52. Xu J, Wu Y, Lu G, Xie S, Ma Z, Chen Z, Shen HM, Xia D. Importance of ROS-mediated autophagy in determining apoptotic cell death induced by physapubescin B. *Redox Biol.* 2017; 12:198-207.
53. Geng YD, Yang L, Zhang C, Kong LY. Blockade of epidermal growth factor receptor/mammalian target of rapamycin pathway by Icariside II results in reduced cell proliferation of osteosarcoma cells. *Food Chem Toxicol.* 2014; 73:7-16.
54. Jian KL, Zhang C, Shang ZC, Yang L, Kong LY. Eucalrobosone C suppresses cell proliferation and induces ROS-dependent mitochondrial apoptosis via the p38 MAPK pathway in hepatocellular carcinoma cells. *Phytomedicine.* 2017; 25:71-82.
55. Zhang C, Yang L, Geng YD, An FL, Xia YZ, Guo C, Luo JG, Zhang LY, Guo QL, Kong LY. Icariside II, a natural mTOR inhibitor, disrupts aberrant energy homeostasis via suppressing mTORC1-4E-BP1 axis in sarcoma cells. *Oncotarget.* 2016; 7:27819. doi: 10.18632/oncotarget.8538.
56. Zhao H, Wang C, Lu B, Zhou Z, Jin Y, Wang Z, Zheng L, Liu K, Luo T, Zhu D, Chi G, Luo Y, Ge P. Pristimerin triggers AIF-dependent programmed necrosis in glioma cells via activation of JNK. *Cancer Lett.* 2016; 374:136-148.
57. Geng YD, Zhang C, Shi YM, Xia YZ, Guo C, Yang L, Kong LY. Icariside II-induced mitochondrion and lysosome mediated apoptosis is counterbalanced by an autophagic salvage response in hepatoblastoma. *Cancer Lett.* 2015; 366:19-31.
