# Supplementary material for: Anti-proliferation of triple-negative breast cancer cells with physagulide P: ROS/JNK signaling pathway induces apoptosis and autophagic cell death
Source: PubMed Central journal article supplement (PMC5609982; doi:10.18632/oncotarget.19299), 2017-07-17
Supplement: oncotarget-08-64032-s001.pdf [file oncotarget-08-64032-s001.pdf]

## Anti-proliferation of triple-negative breast cancer cells with physagulide P: ROS/JNK signaling pathway induces apoptosis and autophagic cell death

### SUPPLEMENTARY FIGURE

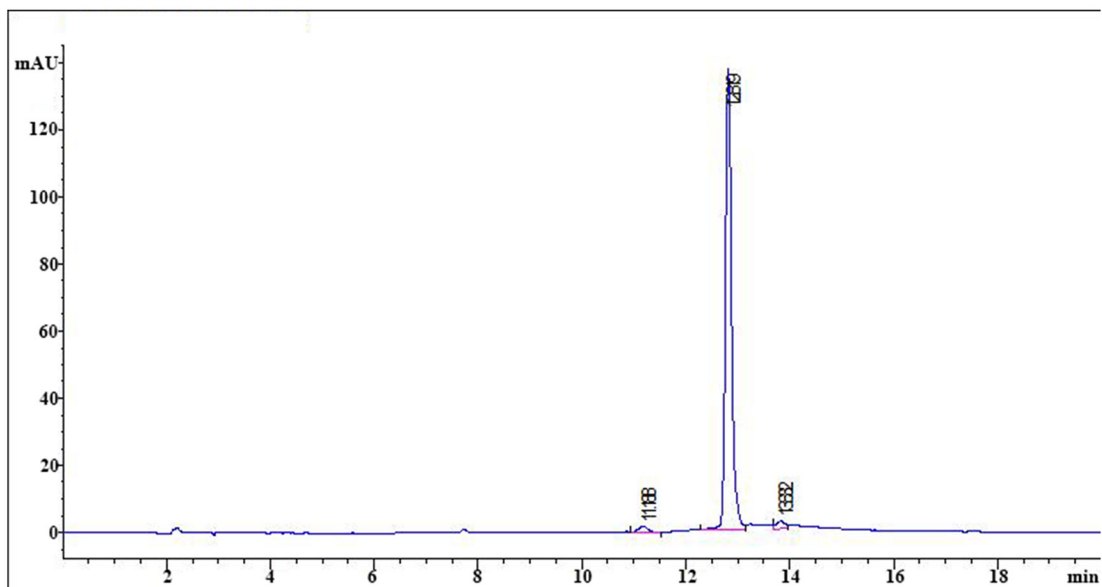

| Retention-time <sup>∘</sup> | Area <sup>∘</sup>     | Height <sup>∘</sup> | Width <sup>∘</sup>  | Symmetry <sup>∘</sup> | Area% <sup>∘</sup>  |
|-----------------------------|-----------------------|---------------------|---------------------|-----------------------|---------------------|
| 11.188 <sup>∘</sup>         | 201.4 <sup>∘</sup>    | 17.2 <sup>∘</sup>   | 0.1842 <sup>∘</sup> | 1.16 <sup>∘</sup>     | 1.697 <sup>∘</sup>  |
| 12.819 <sup>∘</sup>         | 111404.3 <sup>∘</sup> | 1372.8 <sup>∘</sup> | 0.1269 <sup>∘</sup> | 0.825 <sup>∘</sup>    | 96.090 <sup>∘</sup> |
| 13.832 <sup>∘</sup>         | 262.6 <sup>∘</sup>    | 20.8 <sup>∘</sup>   | 0.1792 <sup>∘</sup> | 1.027 <sup>∘</sup>    | 2.213 <sup>∘</sup>  |

Figure 1: The HPLC of Physagulide P showed that the purity was 96.090% in solvent system of 50%-100% MeOH/H<sub>2</sub>O and the retention time was 12.819 min (total time: 20min).
